# Supplementary material for: Effectiveness of Cognitive Behavioral Therapy–Based Intervention in Preventing Gaming Disorder and Unspecified Internet Use Disorder in Adolescents: A Cluster Randomized Clinical Trial
Source: PubMed Central journal article supplement (PMC8857686; doi:10.1001/jamanetworkopen.2021.48995), 2022-02-18
Supplement: jamanetwopen-e2148995-s001.pdf [file jamanetwopen-e2148995-s001.pdf]

## Supplementary Online Content

Lindenberg K, Kindt S, Szász-Janocha C. Effectiveness of cognitive behavioral therapy–based intervention in preventing gaming disorder and unspecified internet use disorder in adolescents: a cluster randomized clinical trial. *JAMA Netw Open*. 2022;5(2):e2148995. doi:10.1001/jamanetworkopen.2021.48995

**eAppendix.** Descriptions of Procedure, Outcomes, and Model Specification

**eFigure 1.** The PROTECT Intervention for the Prevention of Gaming Disorder and Unspecified Internet Use Disorder

**eFigure 2.** Flow of Participants for Incidence Analysis

**eFigure 3.** Procrastination Symptom Changes Over 12 Months

**eTable 1.** Descriptive Statistics Separated by Group

**eTable 2.** Descriptive Statistics and Effect Sizes of Primary Outcomes

**eTable 3.** Level 3 Baseline Data (Means) by School

**eTable 4.** Parameter Estimates for Multilevel Linear Growth Model Examining GD/Unspecified IUD Symptom Reduction

**eTable 5.** 12-Months Incidence Rates by Group, Stratified by Baseline Risk of Illness-Onset

**eTable 6.** Correlation Matrix of GD/Unspecified IUD Symptoms With Comorbid Symptoms at Baseline

**eTable 7.** Parameter Estimates for Multilevel Linear Growth Model Examining Procrastination Symptom Reduction

**eTable 8.** Descriptive Statistics and Effect Sizes of Secondary Outcomes

**eTable 9.** Results of Fixed Effects Parameters for Secondary Outcome Measures

**eReferences**

This supplementary material has been provided by the authors to give readers additional information about their work.

## **eAppendix.** Descriptions of Procedure, Outcomes, and Model Specification

### **Description of Procedure**

The presented data base upon the pre-registered PROTECT study (ClinicalTrials.gov: NCT02907658), which was funded by the Dietmar Hopp Foundation. The published study protocol<sup>1</sup> (Supplement 1) was approved by the University of Education Heidelberg Research Ethics Committee on September 3, 2015 (Az.: 7741.35-13). Approval from the Regional Council was obtained on October 19, 2015 (Az.: 71c2-6499.25).

Participants were recruited from October 2015 to December 2016 in 41 interested high-schools, of which 33 finally participated. All high-schools in the Rhine-Neckar metropolitan region were contacted via the headmaster's office and participated on a voluntary basis. Eligible students and their parents received detailed information about the relevance, aims, and procedure of the study. Informed written consent was obtained from all participants and from their legal guardians. The PROTECT program as well as the assessments were conducted in situ at the schools between October 2015 and September 2018.

### **Description of Outcomes**

Time spent online was assessed separately for weekdays (Monday through Friday) and weekends. The total average time per day was computed as follows:  $(5 * \text{average time on weekdays} + 2 * \text{average time on weekends}) / 7$ . In addition, we assessed the frequency of gaming, chatting and surfing.

We adapted the CSAS items to cover both GD and unspecified IUD (e.g., item 1: "Even when I am not gaming/online, I think about online gaming/the Internet" for preoccupation) with permission by the publisher. Additionally, we assessed *incidence rates of GD and unspecified IUD*. The CSAS includes all 9 diagnostic criteria for Internet Gaming Disorder as defined in the DSM-5. These criteria are assessed by 2 items each (18 in total) on a 4-point Likert scale from 0 to 3 ("strongly disagree", "somewhat disagree", "somewhat agree", "strongly agree"), resulting in a range of 0-56. A criterion of IGD is met, if at least one of the items has been rated with 3 ("strongly agree").

Participants in both arms of the study were assessed at the 12-month follow-up using a clinical interview based on the criteria of IGD as proposed in the DSM-5. To assess both gaming and non-gaming subtypes, the interview includes two separate sections to assess GD and unspecified IUD subsequently. It contains 107 structured questions per section (214 in total), assessing the following nine criteria for GD and unspecified IUD according to a branched structure. Full-syndrome GD or unspecified IUD was defined by meeting 5 or more criteria. Subthreshold GD or unspecified IUD was defined by meeting 3 or more criteria.

*Procrastination* was assessed with the German Procrastination Questionnaire (APROF)<sup>2</sup>. *General psychopathology* was assessed with the Strengths and Difficulties Questionnaire (SDQ)<sup>3</sup>. We assessed symptoms of *depression* using the German Depression Inventory for Children and Adolescents (DIKJ)<sup>4,5</sup>. *Social anxiety* was measured with the German version of the Social Interaction Anxiety Scale (SIAS)<sup>6,7</sup>. We assessed *performance anxiety and school anxiety* using a subscale of the German revision of the Fear Survey Schedule for Children (PHOKI)<sup>8,9</sup>. To assess *emotion regulation strategies*, we used the German Questionnaire for the Assessment of Emotion Regulation in Children and Adolescents (FEEL-KJ)<sup>10</sup>. We used the fear and sadness items (60), which can be rated on a 5-point scale from 1 (“almost never”) to 5 (“almost always”) and calculated the scores of *adaptive emotion regulation strategies* and *maladaptive emotion regulation strategies* across emotions. *Social behavior and learning behavior* was assessed with the German Student Assessment List for Social and Learning Behavior (SSL)<sup>11</sup>. We assessed *self-efficacy* using the German General Self-Efficacy Scale (SWE)<sup>12</sup>. Adverse events were not recorded. The assessments and interviews took place in the schools, so the interviewer or people who administered the assessments could not be blinded. However, the audiotapes were recorded anonymously so that the second rater could be blinded.

## **Description of Model Specification**

We included participants with missing data in the analysis, because baseline data did not differ significantly between participants who were lost to follow-up and participants with complete datasets. Missing values were not imputed. Prior to specifying models, all outcome data were tested for statistical assumptions. Variables were fitted to the 3-level hierarchical linear growth models and tested in three steps. In step one, we nested variance components

in 3 levels, i.e., time within individuals within schools, and computed an unconditional means model (model 0), describing outcome variation as a function of initial status. Thus, we included initial status as a fixed effect parameter (intercept  $\gamma_{00}$ ) to predict the outcome. Residual variance components were used to analyze significant systematic variation, justifying further model specification. Significant residual variance components at level 1 indicate systematic variation left within-persons ( $\sigma^2_{\varepsilon}$ ) and between-persons ( $\sigma^2_0$ ) and justify the inclusion of additional parameters that might explain intra-individual differences (i.e., symptom change over time) and inter-individual differences (i.e., group differences). Thus, in step two, we specified unconditional growth models (model 1), including the rate of change (slope  $\gamma_{10}$ ) as additional fixed effect parameter to initial status (intercept  $\gamma_{00}$ ) to predict the outcome. In step three (model 2), we specified conditional growth models with random intercepts and random slopes, including the group parameter ( $\gamma_{11}$ ; coded as PROTECT=1) as additional predictor for the outcome. Models were compared by fit parameters (AIC and -2 log-likelihood). All analyses were conducted using IBM SPSS 27.

**eFigure 1.** The PROTECT Intervention for the Prevention of Gaming Disorder and Unspecified Internet Use Disorder

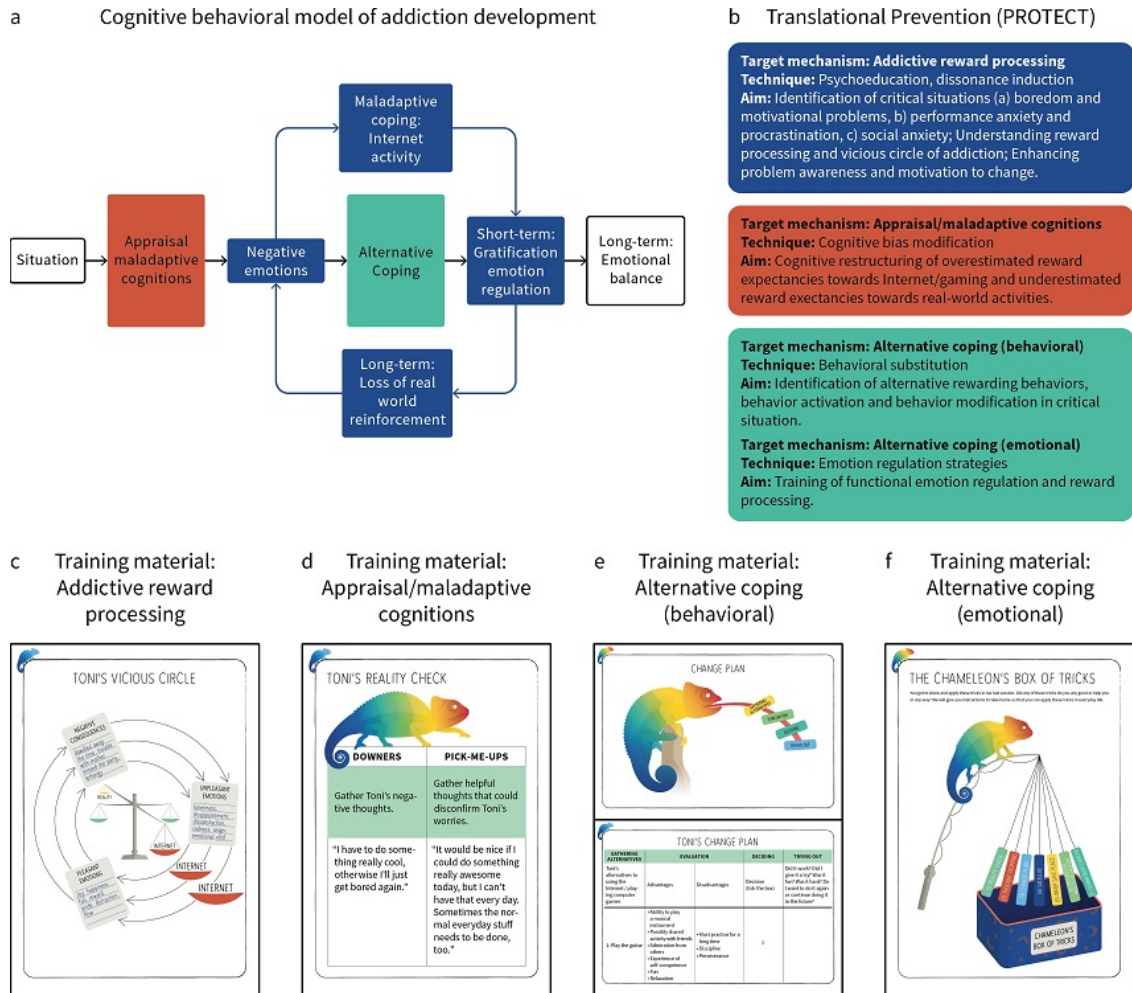

*Note.* 1a) The cognitive behavioral etiology model of gaming disorder and unspecified Internet use disorder (Lindenberg et al., 2020)<sup>13</sup>. 1b) Translation of target mechanisms and intervention techniques. 1c)-1f) Training material.

**eFigure 2.** Flow of Participants for Incidence Analysis

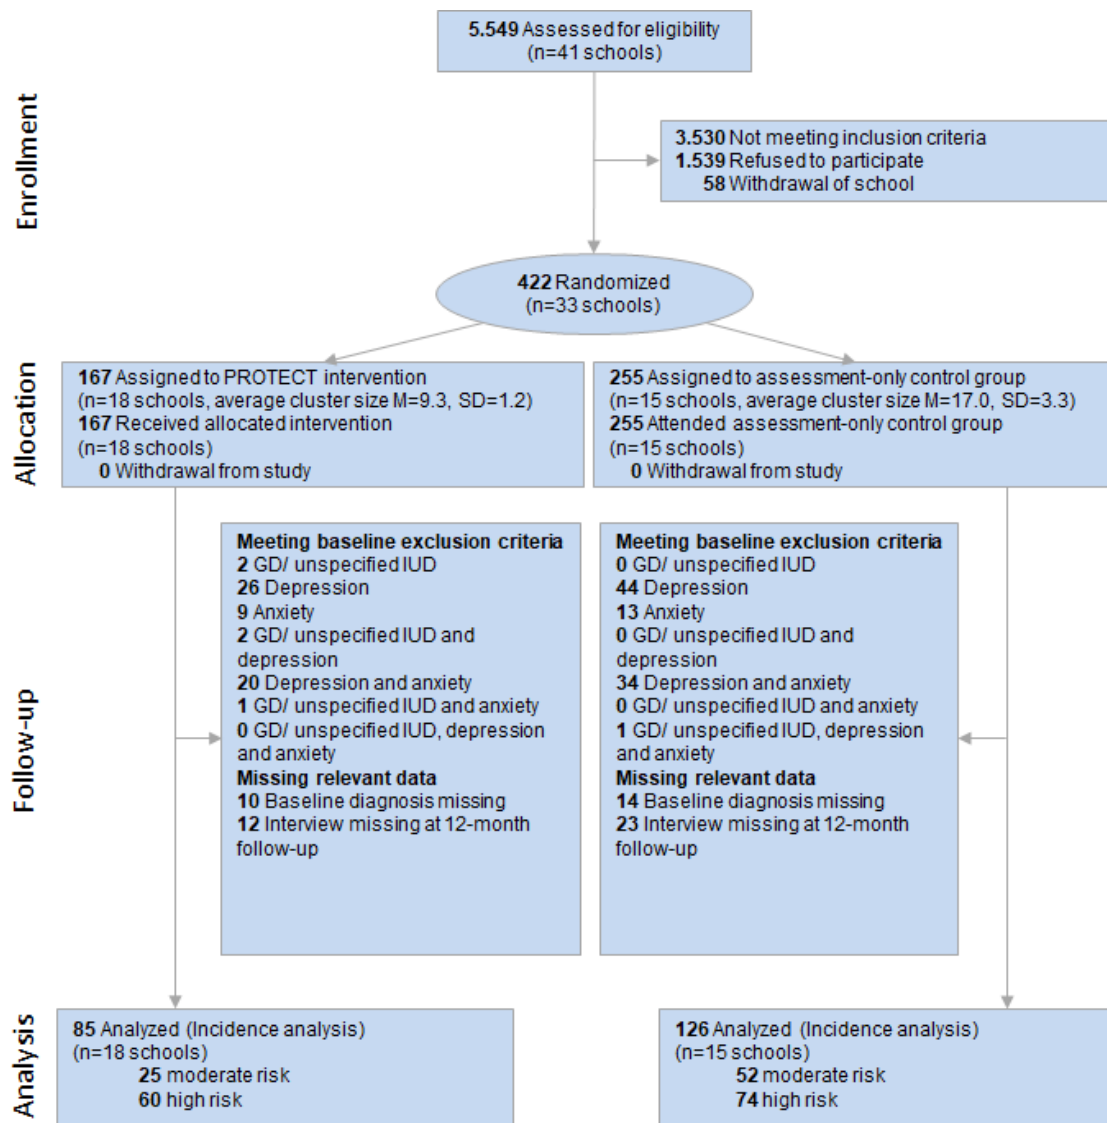

Note. GD=gaming disorder, unspecified IUD=unspecified Internet use disorder. *Moderate risk* is defined as  $20 \geq \text{CIUS} \leq 23$ , *high risk* is defined as  $\text{CIUS} \geq 24$ . CIUS=compulsive Internet use scale.

**eFigure 3.** Procrastination Symptom Changes Over 12 Months

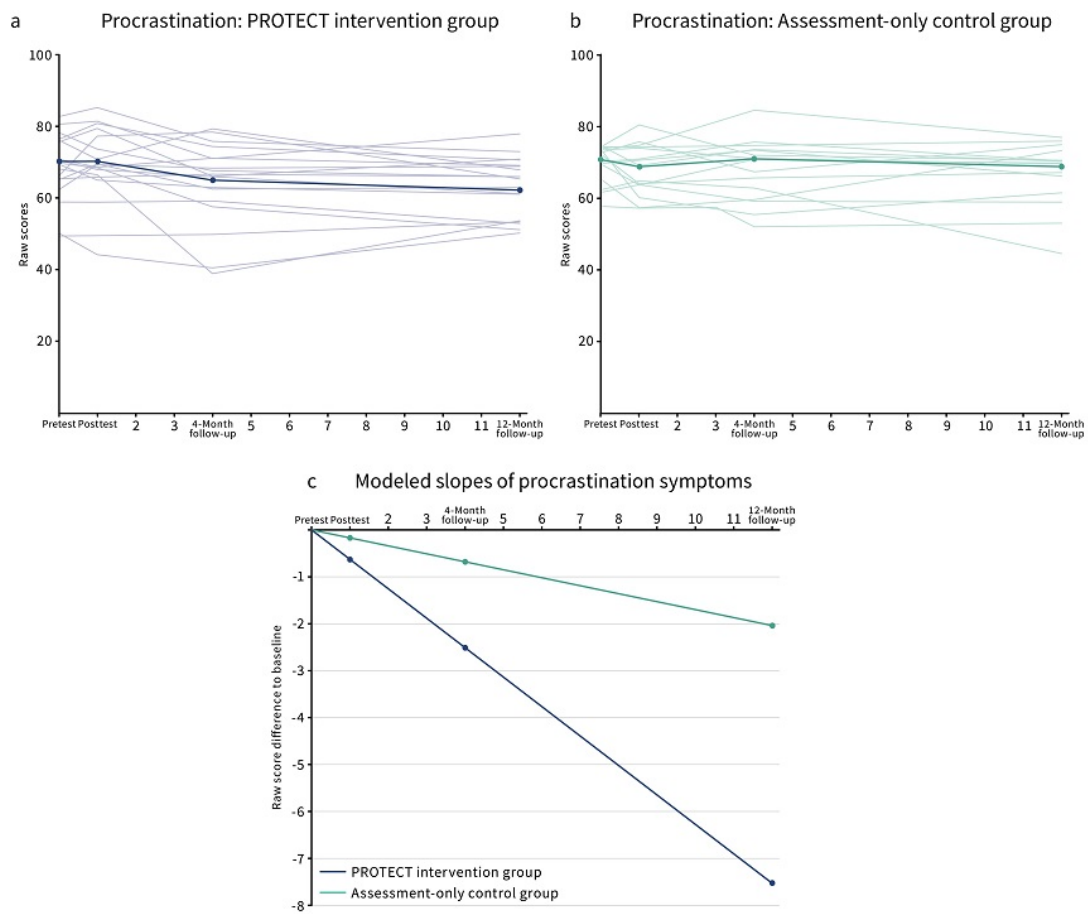

*Note.* 3a) Symptom courses in PROTECT intervention group (each line represents average score of one school) 3b) symptom in courses assessment-only control group, 3c) modeled symptom courses.

**eTable 1.** Descriptive Statistics Separated by Group

|                                                     | PROTECT group |           | Assessment-only control group |           | Group differences           |          |
|-----------------------------------------------------|---------------|-----------|-------------------------------|-----------|-----------------------------|----------|
|                                                     | <i>n</i>      | %         | <i>n</i>                      | %         | <i>Chi</i> <sup>2</sup>     | <i>P</i> |
| Sex                                                 |               |           |                               |           |                             |          |
| Male                                                | 79            | 47.3      | 114                           | 44.7      | .275 ( <i>df</i> =1)        | .600     |
| Female                                              | 88            | 52.7      | 141                           | 55.3      |                             |          |
| School type                                         |               |           |                               |           |                             |          |
| low-level                                           | 32            | 19.2      | 20                            | 7.8       | 11.966 ( <i>df</i> =1)      | .001     |
| middle-level                                        | 41            | 24.6      | 19                            | 7.5       | 24.193 ( <i>df</i> =1)      | <.001    |
| high-level                                          | 51            | 30.5      | 99                            | 38.8      | 3.023 ( <i>df</i> =1)       | .051     |
| comprehensive school                                | 10            | 6.0       | 8                             | 3.1       | 2.008 ( <i>df</i> =1)       | .122     |
| vocational track (low-level)                        | 12            | 7.2       | 23                            | 9.0       | .446 ( <i>df</i> =1)        | .316     |
| vocational track (high-level)                       | 21            | 12.6      | 86                            | 33.7      | 23.852 ( <i>df</i> =1)      | <.001    |
|                                                     | <i>M</i>      | <i>SD</i> | <i>M</i>                      | <i>SD</i> | <i>t</i>                    | <i>p</i> |
| Age                                                 | 14.60         | 1.96      | 15.44                         | 1.98      | 4.266 ( <i>df</i> =420)     | <.001    |
| IA Screening (CIUS)                                 | 29.05         | 6.98      | 26.21                         | 5.61      | 4.403 ( <i>df</i> =300.946) | <.001    |
| GD/ unspecified IUD (CSAS)                          | 15.01         | 7.43      | 12.92                         | 7.09      | 2.818 ( <i>df</i> =396)     | .005     |
| Time spent online (hrs/day)                         | 4.75          | 2.20      | 4.54                          | 2.22      | -.827 ( <i>df</i> =336)     | .409     |
| Procrastination (APROF)                             | 69.86         | 19.57     | 70.62                         | 20.70     | .362 ( <i>df</i> =393)      | .717     |
| General Psychopathology (SDQ)                       | 12.28         | 4.95      | 12.50                         | 4.72      | .454 ( <i>df</i> =396)      | .650     |
| Depressive Symptoms (DIKJ)                          | 14.69         | 6.94      | 15.01                         | 7.09      | .440 ( <i>df</i> =395)      | .660     |
| Social Anxiety (SIAS)                               | 24.52         | 12.00     | 26.24                         | 13.38     | 1.306 ( <i>df</i> =396)     | .192     |
| Performance Anxiety and School Anxiety (PHOKI)      | 6.83          | 3.91      | 7.04                          | 3.60      | .553 ( <i>df</i> =394)      | .581     |
| Adaptive Emotion Regulation Strategies (FEEL-KJ)    | 6.37          | 1.28      | 6.45                          | 1.25      | .662 ( <i>df</i> =394)      | .508     |
| Maladaptive Emotion Regulation Strategies (FEEL-KJ) | 5.30          | 1.28      | 5.54                          | 1.38      | 1.712 ( <i>df</i> =394)     | .088     |
| Social and Learning Behavior (SSL)                  | 86.05         | 17.76     | 91.31                         | 14.52     | 3.088 ( <i>df</i> =284.763) | .002     |
| Self-Efficacy (SWE)                                 | 26.95         | 5.07      | 27.13                         | 4.98      | .354 ( <i>df</i> =395)      | .724     |

*Note.* The German school system comprises six secondary-school types, i.e., low-level schools, middle-level schools, high-level schools, comprehensive schools, vocational schools at low-level and vocational schools at high-level. GD=gaming disorder, unspecified IUD=unspecified Internet use disorder. CIUS=compulsive Internet use scale; CSAS=modified German video game dependency scale to assess GD/ unspecified IUD. APROF=procrastination scale; SDQ=general psychopathology scale; DIKJ=depression scale; SIAS=social anxiety scale; PHOKI=performance anxiety and school anxiety scale; FEEL-KJ adaptive=adaptive emotion regulation strategy scale; FEEL-KJ maladaptive=maladaptive emotion regulation strategy scale; SSL=social and learning behavior scale; SWE=self-efficacy scale.



**eTable 2. Descriptive Statistics and Effect Sizes of Primary Outcomes**

| Outcome Measure                                    | Baseline                  | 1-month FU                | 4-month FU                | 12-month FU               | Baseline vs. 12-months |
|----------------------------------------------------|---------------------------|---------------------------|---------------------------|---------------------------|------------------------|
|                                                    | <i>M</i><br>( <i>SD</i> ) | <i>M</i><br>( <i>SD</i> ) | <i>M</i><br>( <i>SD</i> ) | <i>M</i><br>( <i>SD</i> ) | <i>d</i>               |
| <b>GD/ unspecified IUD Symptom Severity (CSAS)</b> |                           |                           |                           |                           |                        |
| PROTECT intervention group                         | 13.74<br>(6.82)           | 14.46<br>(8.24)           | 12.09<br>(8.28)           | 9.20<br>(8.26)            | 0.67                   |
| Assessment-only control group                      | 13.74<br>(6.81)           | 12.48<br>(7.15)           | 12.74<br>(7.91)           | 10.07<br>(6.89)           | 0.54                   |

*Note.* Level-3 baseline differences were controlled. Level 3 baseline data (means) by school can be found in eTable3. GD=gaming disorder, unspecified IUD = unspecified Internet use disorder. CSAS= modified German video game dependency scale to assess GD/ unspecified IUD. *d* = Cohen's *d* statistic.

**eTable 3. Level 3 Baseline Data (Means) by School**

| School | CSAS<br><i>M</i> | APROF<br><i>M</i> | SDQ<br><i>M</i> | DIKJ<br><i>M</i> | SIAS<br><i>M</i> | PHOKI<br><i>M</i> | FEEL<br>adapt.<br><i>M</i> | FEEL<br>malad.<br><i>M</i> | SSL<br><i>M</i> | SWE<br><i>M</i> |
|--------|------------------|-------------------|-----------------|------------------|------------------|-------------------|----------------------------|----------------------------|-----------------|-----------------|
| 1      | 10.83            | 69.50             | 15.38           | 15.00            | 28.44            | 6.83              | 6.11                       | 5.28                       | 79.50           | 25.83           |
| 2      | 12.50            | 67.77             | 15.17           | 17.33            | 28.67            | 7.85              | 6.60                       | 5.23                       | 83.33           | 25.00           |
| 3      | 22.50            | 62.00             | 9.50            | 8.00             | 13.00            | 4.00              | 6.26                       | 5.15                       | 105.50          | 32.50           |
| 4      | 15.67            | 62.17             | 12.00           | 14.00            | 29.67            | 8.00              | 6.14                       | 4.52                       | 94.50           | 27.17           |
| 5      | 11.50            | 73.50             | 14.88           | 17.50            | 19.97            | 6.00              | 6.20                       | 6.02                       | 82.75           | 28.00           |
| 6      | 14.00            | 70.50             | 11.25           | 11.75            | 26.00            | 3.00              | 6.27                       | 5.03                       | 79.75           | 25.25           |
| 7      | 14.86            | 73.32             | 12.40           | 13.50            | 26.13            | 7.26              | 6.84                       | 4.98                       | 90.29           | 28.32           |
| 8      | 16.17            | 64.73             | 12.07           | 17.42            | 25.73            | 8.67              | 5.82                       | 5.51                       | 83.06           | 26.60           |
| 9      | 19.66            | 70.19             | 14.41           | 16.38            | 23.92            | 6.67              | 6.09                       | 5.08                       | 72.77           | 24.25           |
| 10     | 11.12            | 74.54             | 12.63           | 16.03            | 25.19            | 6.80              | 6.68                       | 5.96                       | 89.46           | 28.12           |
| 11     | 19.24            | 72.55             | 13.40           | 18.00            | 30.80            | 7.40              | 6.50                       | 6.16                       | 80.60           | 24.60           |
| 12     | 12.70            | 61.45             | 12.00           | 14.39            | 27.87            | 7.20              | 6.34                       | 5.14                       | 88.45           | 27.75           |
| 13     | 18.83            | 76.00             | 12.00           | 10.83            | 20.17            | 6.50              | 6.68                       | 5.15                       | 93.50           | 28.00           |
| 14     | 13.24            | 70.05             | 10.54           | 12.48            | 28.67            | 7.03              | 6.30                       | 5.40                       | 95.62           | 27.67           |
| 15     | 11.63            | 69.38             | 11.11           | 11.58            | 19.56            | 5.94              | 6.72                       | 5.16                       | 95.31           | 29.69           |
| 16     | 14.99            | 69.07             | 10.44           | 13.16            | 25.00            | 6.70              | 6.73                       | 5.36                       | 85.80           | 28.29           |
| 17     | 11.30            | 58.60             | 11.15           | 12.60            | 20.18            | 4.40              | 6.25                       | 4.57                       | 96.80           | 29.20           |
| 18     | 13.21            | 73.74             | 12.95           | 16.33            | 24.67            | 7.11              | 6.46                       | 5.79                       | 95.48           | 25.68           |
| 19     | 12.20            | 65.80             | 10.40           | 12.80            | 21.40            | 5.00              | 6.76                       | 5.18                       | 90.40           | 27.80           |
| 20     | 13.71            | 82.29             | 14.79           | 17.79            | 26.14            | 7.14              | 6.22                       | 6.16                       | 89.93           | 25.53           |
| 21     | 11.57            | 57.57             | 14.14           | 14.14            | 27.86            | 7.86              | 5.89                       | 5.75                       | 87.71           | 27.29           |
| 22     | 14.13            | 75.75             | 11.75           | 14.75            | 30.13            | 7.75              | 5.83                       | 5.40                       | 88.38           | 27.25           |
| 23     | 12.15            | 69.39             | 11.25           | 14.59            | 25.54            | 6.82              | 6.25                       | 5.59                       | 96.33           | 25.80           |
| 24     | 17.60            | 65.04             | 12.05           | 17.82            | 24.96            | 8.55              | 5.83                       | 5.19                       | 78.27           | 24.57           |
| 25     | 16.71            | 77.86             | 16.71           | 16.71            | 33.29            | 8.71              | 7.26                       | 5.39                       | 70.86           | 24.29           |
| 26     | 13.17            | 49.17             | 15.17           | 11.79            | 8.00             | 5.33              | 5.87                       | 4.37                       | 87.53           | 27.33           |
| 27     | 16.57            | 80.17             | 11.36           | 15.71            | 33.07            | 6.00              | 6.82                       | 5.81                       | 86.43           | 28.43           |
| 28     | 17.19            | 72.14             | 16.71           | 21.57            | 22.00            | 6.57              | 5.86                       | 6.19                       | 85.00           | 29.57           |
| 29     | 10.65            | 74.22             | 12.29           | 13.78            | 24.98            | 6.83              | 6.82                       | 5.83                       | 95.94           | 26.83           |
| 30     | 13.40            | 65.20             | 14.00           | 16.00            | 25.18            | 7.50              | 5.93                       | 4.56                       | 86.06           | 25.61           |
| 31     | 17.00            | 74.14             | 13.14           | 17.86            | 32.43            | 7.29              | 6.38                       | 6.11                       | 88.57           | 26.14           |
| 32     | 15.25            | 75.25             | 9.25            | 15.50            | 30.00            | 10.00             | 6.06                       | 5.70                       | 89.08           | 25.75           |
| 33     | 6.00             | 50.00             | 9.00            | 5.50             | 15.33            | 4.50              | 7.01                       | 4.43                       | 107.00          | 31.00           |

*Note.* CSAS= modified German video game dependency scale to assess gaming disorder and unspecified Internet use disorder. APROF=procrastination scale; SDQ=general psychopathology scale; DIKJ=depression scale; SIAS=social anxiety scale; PHOKI=performance anxiety and school anxiety scale; FEEL adapt.=adaptive emotion regulation strategy scale; FEEL malad.=maladaptive emotion regulation strategy scale; SSL=social and learning behavior scale; SWE=self-efficacy scale.

**eTable 4.** Parameter Estimates for Multilevel Linear Growth Model Examining GD/Unspecified IUD Symptom Reduction

|                           |                                         | GD/ unspecified IUD Symptoms<br>(CSAS-Score) |                           |                           |
|---------------------------|-----------------------------------------|----------------------------------------------|---------------------------|---------------------------|
| Parameter                 |                                         | Model 0                                      | Model 1                   | Model 2                   |
| Fixed Effects             |                                         |                                              |                           |                           |
| Initial Status            | Intercept ( $\gamma_{00}$ )             | <b>12.49***</b><br>(0.45)                    | <b>13.91***</b><br>(0.46) | <b>12.76***</b><br>(0.56) |
|                           | PROTECT ( $\gamma_{01}$ )               |                                              |                           | <b>2.47**</b><br>(0.84)   |
| Rate of Change            | Slope ( $\gamma_{10}$ )                 |                                              | <b>-0.35***</b><br>(0.03) | <b>-0.30***</b><br>(0.04) |
|                           | PROTECT ( $\gamma_{11}$ )               |                                              |                           | <b>-0.13*</b><br>(0.06)   |
| Variance Components       |                                         |                                              |                           |                           |
| Level-1 residual variance | Within-Person ( $\sigma_{\epsilon}^2$ ) | <b>30.65***</b><br>(1.34)                    | <b>26.97***</b><br>(1.18) | <b>26.86***</b><br>(1.18) |
| Level-2 residual variance | Initial Status ( $\sigma_0^2$ )         | <b>29.22***</b><br>(2.77)                    | <b>30.54***</b><br>(2.78) | <b>30.66***</b><br>(2.79) |
| Level-3 residual variance | Initial Status ( $\sigma_2^2$ )         | 2.78<br>(1.54)                               | 2.76<br>(1.51)            | 1.61<br>(1.31)            |
| Model Fit Parameters      |                                         |                                              |                           |                           |
|                           | -2 Log-Likelihood                       | 9726.92                                      | 9596.64                   | 9586.95                   |
|                           | AIC                                     | 9734.92                                      | 9606.64                   | 9600.95                   |

*Note.* PROTECT=dummy coded group variable (1=PROTECT intervention group, 0=assessment-only control group). GD=gaming disorder, unspecified IUD=unspecified Internet use disorder, CSAS=modified German video game dependency scale to assess GD/unspecified IUD. Standard errors are displayed in brackets. The rate of change displays the amount of change per month. \* $p < .05$ , \*\* $p < .01$ , \*\*\* $p < .001$ .

**eTable 5.** 12-Months Incidence Rates by Group, Stratified by Baseline Risk of Illness-Onset

|                                                                                    |       | PROTECT<br>intervention group | Assessment-only<br>control group | <i>p</i> |
|------------------------------------------------------------------------------------|-------|-------------------------------|----------------------------------|----------|
| Full-syndrome cases (GD) at 12-month follow-up                                     |       |                               |                                  |          |
| <i>Moderate risk</i> at baseline                                                   | total | <i>n</i> =25                  | <i>n</i> =52                     |          |
|                                                                                    | no    | <i>n</i> =25 (100.0%)         | <i>n</i> =52 (100.0%)            |          |
|                                                                                    | case  | <i>n</i> =0 (0.0%)            | <i>n</i> =0 (0.0%)               |          |
| <i>High risk</i> at baseline                                                       | total | <i>n</i> =60                  | <i>n</i> =74                     |          |
|                                                                                    | no    | <i>n</i> =60 (100.0%)         | <i>n</i> =74 (100.0%)            |          |
|                                                                                    | case  | <i>n</i> =0 (0.0%)            | <i>n</i> =0 (0.0%)               |          |
| Full-syndrome cases (unspecified IUD) at 12-month follow-up                        |       |                               |                                  |          |
| <i>Moderate risk</i> at baseline                                                   | total | <i>n</i> =25                  | <i>n</i> =52                     | .245     |
|                                                                                    | no    | <i>n</i> =23 (92.0%)          | <i>n</i> =51 (98.1%)             |          |
|                                                                                    | case  | <i>n</i> =2 (8.0%)            | <i>n</i> =1 (1.8%)               |          |
| <i>High risk</i> at baseline                                                       | total | <i>n</i> =60                  | <i>n</i> =74                     | .631     |
|                                                                                    | no    | <i>n</i> =56 (93.3%)          | <i>n</i> =69 (93.2%)             |          |
|                                                                                    | case  | <i>n</i> =4 (6.7%)            | <i>n</i> =5 (6.8%)               |          |
| Subthreshold cases (GD) at 12-month follow-up                                      |       |                               |                                  |          |
| <i>Moderate risk</i> at baseline                                                   | total | <i>n</i> =25                  | <i>n</i> =52                     | .526     |
|                                                                                    | no    | <i>n</i> =23 (92.0%)          | <i>n</i> =49 (94.0%)             |          |
|                                                                                    | case  | <i>n</i> =2 (8.0%)            | <i>n</i> =3 (5.8%)               |          |
| <i>High risk</i> at baseline                                                       | total | <i>n</i> =60                  | <i>n</i> =74                     | .255     |
|                                                                                    | no    | <i>n</i> =59 (98.3%)          | <i>n</i> =70 (94.6%)             |          |
|                                                                                    | case  | <i>n</i> =1 (1.7%)            | <i>n</i> =4 (5.4%)               |          |
| Subthreshold cases (unspecified IUD) at 12-month follow-up                         |       |                               |                                  |          |
| <i>Moderate risk</i> at baseline                                                   | total | <i>n</i> =25                  | <i>n</i> =52                     | .406     |
|                                                                                    | no    | <i>n</i> =22 (88.0%)          | <i>n</i> =43 (82.7%)             |          |
|                                                                                    | case  | <i>n</i> =3 (12.0%)           | <i>n</i> =9 (17.3%)              |          |
| <i>High risk</i> at baseline                                                       | total | <i>n</i> =60                  | <i>n</i> =74                     | .182     |
|                                                                                    | no    | <i>n</i> =53 (88.3%)          | <i>n</i> =60 (81.1%)             |          |
|                                                                                    | case  | <i>n</i> =7 (11.7%)           | <i>n</i> =14 (18.9%)             |          |
| Any subthreshold or full-syndrome cases (GD/unspecified IUD) at 12-month follow-up |       |                               |                                  |          |
| <i>Moderate risk</i> at baseline                                                   | total | <i>n</i> =25                  | <i>n</i> =52                     | .420     |
|                                                                                    | no    | <i>n</i> =18 (72.0%)          | <i>n</i> =40 (76.9%)             |          |
|                                                                                    | case  | <i>n</i> =7 (28.0%)           | <i>n</i> =12 (23.1%)             |          |
| <i>High risk</i> at baseline                                                       | total | <i>n</i> =60                  | <i>n</i> =74                     | .093     |
|                                                                                    | no    | <i>n</i> =49 (81.7%)          | <i>n</i> =52 (70.3%)             |          |
|                                                                                    | case  | <i>n</i> =11 (18.3%)          | <i>n</i> =22 (29.7%)             |          |

*Note.* GD=gaming disorder, unspecified IUD = unspecified Internet use disorder. *Moderate risk* is defined as  $20 \leq \text{CIUS} \leq 23$ , *high risk* is defined as  $\text{CIUS} \geq 24$ . CIUS=compulsive Internet use scale; cases and healthy individuals are presented in total numbers; incidence rates are displayed in brackets. Full-syndrome cases=5 or more GD or unspecified IUD criteria. Subthreshold cases=3 or 4 GD or unspecified IUD criteria. Any subthreshold or full-syndrome cases = anyone meeting 3 or more GD and/ or unspecified IUD criteria.

**eTable 6.** Correlation Matrix of GD/Unspecified IUD Symptoms With Comorbid Symptoms at Baseline

|                                          | 1        | 2       | 3       | 4       | 5       | 6       | 7       | 8       | 9      | 10 |
|------------------------------------------|----------|---------|---------|---------|---------|---------|---------|---------|--------|----|
| GD/ unspecified IUD (CSAS)               | -        |         |         |         |         |         |         |         |        |    |
| Procrastination (APROF)                  | .266**   | -       |         |         |         |         |         |         |        |    |
| General Psychopathology (SDQ)            | .326**   | .379**  | -       |         |         |         |         |         |        |    |
| Depressive Symptoms (DIKJ)               | .269**   | .485**  | .690**  | -       |         |         |         |         |        |    |
| Social Anxiety (SIAS)                    | .275**   | .349**  | .453**  | .522**  | -       |         |         |         |        |    |
| Performance and School Anxiety (PHOKI)   | .206**   | .260**  | .328**  | .426**  | .494**  | -       |         |         |        |    |
| Adaptive Emotion Regulation (FEEL-KJ)    | - .132** | -.111*  | -.270** | -.374** | -.191** | -.115*  | -       |         |        |    |
| Maladaptive Emotion Regulation (FEEL-KJ) | .244**   | .340**  | .494**  | .569**  | .410**  | .246    | -.193** | -       |        |    |
| Social and Learning Behavior (SSL)       | - .311** | -.345** | -.410** | -.458** | -.290** | -.191** | .263**  | -.108*  | -      |    |
| Self-Efficacy (SWE)                      | - .165** | -.240** | -.394** | -.576** | -.470** | -.393** | .404**  | -.375** | .400** | -  |

*Note.* GD=gaming disorder, unspecified IUD= unspecified Internet use disorder. CSAS= modified German video game dependency scale to assess GD/ unspecified IUD. APROF=procrastination scale; SDQ=general psychopathology scale; DIKJ=depression scale; SIAS=social anxiety scale; PHOKI=performance anxiety and school anxiety scale; FEEL-KJ adaptive=adaptive emotion regulation strategy scale; FEEL-KJ maladaptive=maladaptive emotion regulation strategy scale; SSL=social and learning behavior scale; SWE=self-efficacy scale. \* $p < .05$ , \*\* $p < .01$ .

**eTable 7.** Parameter Estimates for Multilevel Linear Growth Model Examining Procrastination Symptom Reduction

|                           |                                    | Procrastination (APROF-score) |                             |                             |
|---------------------------|------------------------------------|-------------------------------|-----------------------------|-----------------------------|
| Parameter                 |                                    | Model 0                       | Model 1                     | Model 2                     |
| Fixed Effects             |                                    |                               |                             |                             |
| Initial Status            | Intercept ( $\gamma_{00}$ )        | <b>68.13***</b><br>(1.17)     | <b>69.62***</b><br>(1.19)   | <b>70.09***</b><br>(1.51)   |
|                           | PROTECT ( $\gamma_{01}$ )          |                               |                             | -.58<br>(2.27)              |
| Rate of Change            | Slope ( $\gamma_{10}$ )            |                               | <b>-.35***</b><br>(0.69)    | -.17<br>(0.09)              |
|                           | PROTECT ( $\gamma_{11}$ )          |                               |                             | <b>-.46***</b><br>(0.14)    |
| Variance Components       |                                    |                               |                             |                             |
| Level-1 residual variance | Within-Person ( $\sigma_{\xi}^2$ ) | <b>153.40***</b><br>(6.77)    | <b>149.62***</b><br>(6.60)  | <b>148.23***</b><br>(6.54)  |
| Level-2 residual variance | Initial Status ( $\sigma_0^2$ )    | <b>278.40***</b><br>(23.46)   | <b>280.41***</b><br>(23.51) | <b>281.79***</b><br>(23.67) |
| Level-3 residual variance | Initial Status ( $\sigma_2^2$ )    | 14.75<br>(10.76)              | 13.58<br>(10.38)            | 6.61<br>(9.76)              |
| Model Fit Parameters      |                                    |                               |                             |                             |
| -2 Log-Likelihood         |                                    | 12232.35                      | 12206.91                    | 12195.36                    |
| AIC                       |                                    | 12240.38                      | 12216.91                    | 12209.36                    |

*Note.* APROF=procrastination scale. PROTECT=dummy coded group variable (1=PROTECT intervention group, 0=assessment-only control group). Standard errors are displayed in brackets. The rate of change displays the amount of change per month. \* $p < .05$ , \*\* $p < .01$ , \*\*\* $p < .001$ .

**eTable 8. Descriptive Statistics and Effect Sizes of Secondary Outcomes**

| Outcome Measure                                                        | Baseline         | 1-month FU       | 4-month FU       | 12-month FU      | Baseline vs. 12-month FU |
|------------------------------------------------------------------------|------------------|------------------|------------------|------------------|--------------------------|
|                                                                        | <i>M (SD)</i>    | <i>M (SD)</i>    | <i>M (SD)</i>    | <i>M (SD)</i>    | <i>d</i>                 |
| <b>Procrastination (APROF)</b>                                         |                  |                  |                  |                  |                          |
| PROTECT                                                                | 70.32<br>(18.15) | 70.16<br>(18.92) | 65.68<br>(19.33) | 63.84<br>(20.79) | 0.357                    |
| Controls                                                               | 70.32<br>(20.18) | 68.53<br>(21.19) | 70.39<br>(21.88) | 68.63<br>(20.19) | 0.084                    |
| <b>General Psychopathology (SDQ)</b>                                   |                  |                  |                  |                  |                          |
| PROTECT                                                                | 12.42<br>(4.55)  | 12.92<br>(5.91)  | 11.51<br>(5.32)  | 10.73<br>(5.00)  | 0.372                    |
| Controls                                                               | 12.42<br>(4.55)  | 11.84<br>(4.81)  | 11.52<br>(4.92)  | 11.29<br>(5.05)  | 0.247                    |
| <b>Depressive Symptoms (DIKJ)</b>                                      |                  |                  |                  |                  |                          |
| PROTECT                                                                | 14.89<br>(6.38)  | 14.08<br>(7.33)  | 12.87<br>(7.22)  | 12.48<br>(7.59)  | 0.378                    |
| Controls                                                               | 14.89<br>(6.86)  | 13.68<br>(7.34)  | 13.51<br>(7.58)  | 12.94<br>(7.38)  | 0.284                    |
| <b>Social Anxiety (SIAS)</b>                                           |                  |                  |                  |                  |                          |
| PROTECT                                                                | 25.56<br>(10.97) | 24.83<br>(12.07) | 23.36<br>(11.76) | 22.73<br>(12.29) | 0.258                    |
| Controls                                                               | 25.56<br>(13.20) | 23.57<br>(12.47) | 23.71<br>(13.23) | 22.68<br>(12.82) | 0.219                    |
| <b>Performance Anxiety and School Anxiety (PHOKI)</b>                  |                  |                  |                  |                  |                          |
| PROTECT                                                                | 6.96<br>(3.61)   | 6.64<br>(3.65)   | 6.43<br>(3.38)   | 5.80<br>(3.33)   | 0.320                    |
| Controls                                                               | 6.96<br>(3.59)   | 6.28<br>(3.72)   | 6.21<br>(3.69)   | 5.97<br>(3.79)   | 0.276                    |
| <b>Adaptive emotion regulation strategies (FEEL-KJ adaptive)</b>       |                  |                  |                  |                  |                          |
| PROTECT                                                                | 6.42<br>(1.21)   | 6.50<br>(1.47)   | 6.36<br>(1.33)   | 6.33<br>(1.45)   | 0.073                    |
| Controls                                                               | 6.42<br>(1.21)   | 6.44<br>(1.32)   | 6.49<br>(1.22)   | 6.28<br>(1.32)   | 0.113                    |
| <b>Maladaptive emotion regulation strategies (FEEL-KJ maladaptive)</b> |                  |                  |                  |                  |                          |
| PROTECT                                                                | 5.44<br>(1.21)   | 5.40<br>(1.17)   | 5.32<br>(1.13)   | 5.21(1.16)       | 0.192                    |
| Controls                                                               | 5.44<br>(1.30)   | 5.40<br>(1.23)   | 5.47<br>(1.30)   | 5.31<br>(1.25)   | 0.100                    |
| <b>Social and Learning Behavior (SSL)</b>                              |                  |                  |                  |                  |                          |
| PROTECT                                                                | 89.23<br>(15.78) | 91.96<br>(15.47) | 91.45<br>(18.91) | 92.18<br>(16.65) | -0.187                   |
| Controls                                                               | 89.23<br>(13.80) | 90.57<br>(14.79) | 90.40<br>(15.20) | 92.77<br>(14.63) | -0.257                   |
| <b>Self-Efficacy (SWE)</b>                                             |                  |                  |                  |                  |                          |
| PROTECT                                                                | 27.06<br>(4.65)  | 27.62<br>(5.11)  | 28.18<br>(4.87)  | 27.93<br>(4.85)  | -0.186                   |
| Controls                                                               | 27.06<br>(4.85)  | 27.31<br>(5.56)  | 27.95<br>(5.39)  | 27.68<br>(5.28)  | -0.128                   |

*Note.* Level-3 baseline differences were controlled. Level-3 baseline data (baseline means by school) can be found in Supplementary Table ST2. APROF=procrastination scale; SDQ=general psychopathology scale; DIKJ=depression scale; SIAS=social anxiety scale; PHOKI=performance anxiety and school anxiety scale; FEEL-KJ adaptive=adaptive emotion regulation strategy scale; FEEL-KJ maladaptive=maladaptive emotion regulation

strategy scale; SSL=social and learning behavior scale; SWE=self-efficacy scale.  $d$  = Cohen's  $d$  statistic.



**eTable 9.** Results of Fixed Effects Parameters for Secondary Outcome Measures

| Variable                                               | Parameter                      | Estimate | SE    | t value | p value |
|--------------------------------------------------------|--------------------------------|----------|-------|---------|---------|
| Procrastination<br>(APROF)                             | Intercept ( $\gamma_{00}$ )    | 70.085   | 1.514 | 46.288  | <0.001  |
|                                                        | Time ( $\gamma_{10}$ )         | -0.170   | 0.896 | -1.895  | 0.058   |
|                                                        | PROTECT*Time ( $\gamma_{11}$ ) | -0.458   | 0.141 | -3.236  | 0.001   |
| General Psychopathology<br>(SDQ)                       | Intercept ( $\gamma_{00}$ )    | 12.263   | 0.337 | 36.370  | <0.001  |
|                                                        | Time ( $\gamma_{10}$ )         | -0.867   | 0.021 | -4.077  | <0.001  |
|                                                        | PROTECT*Time ( $\gamma_{11}$ ) | -0.049   | 0.033 | -1.466  | 0.143   |
| Depressive Symptoms<br>(DIKJ)                          | Intercept ( $\gamma_{00}$ )    | 14.507   | 0.598 | 24.248  | <0.001  |
|                                                        | Time ( $\gamma_{10}$ )         | -0.136   | 0.027 | -5.113  | <0.001  |
|                                                        | PROTECT*Time ( $\gamma_{11}$ ) | -0.627   | 0.042 | -1.484  | 0.138   |
| Social Anxiety<br>(SIAS)                               | Intercept ( $\gamma_{00}$ )    | 25.139   | 0.741 | 33.918  | <0.001  |
|                                                        | Time ( $\gamma_{10}$ )         | -0.168   | 0.051 | -3.308  | 0.001   |
|                                                        | PROTECT*Time ( $\gamma_{11}$ ) | -0.155   | 0.080 | -1.932  | 0.054   |
| Performance Anxiety and School Anxiety<br>(PHOKI)      | Intercept ( $\gamma_{00}$ )    | 6.722    | 0.213 | 31.623  | <0.001  |
|                                                        | Time ( $\gamma_{10}$ )         | -0.064   | 0.016 | -3.860  | <0.001  |
|                                                        | PROTECT*Time ( $\gamma_{11}$ ) | -0.043   | 0.026 | -1.654  | 0.098   |
| Adaptive Emotion Regulation Strategies<br>(FEEL-KJ)    | Intercept ( $\gamma_{00}$ )    | 6.471    | 0.086 | 75.047  | <0.001  |
|                                                        | Time ( $\gamma_{10}$ )         | -0.009   | 0.006 | -1.352  | 0.177   |
|                                                        | PROTECT*Time ( $\gamma_{11}$ ) | -0.007   | 0.010 | -0.732  | 0.464   |
| Maladaptive Emotion Regulation Strategies<br>(FEEL-KJ) | Intercept ( $\gamma_{00}$ )    | 5.506    | 0.093 | 59.206  | <0.001  |
|                                                        | Time ( $\gamma_{10}$ )         | -0.014   | 0.006 | -2.454  | 0.014   |
|                                                        | PROTECT*Time ( $\gamma_{11}$ ) | -0.005   | 0.009 | -0.502  | 0.616   |
| Social and Learning Behavior<br>(SSL)                  | Intercept ( $\gamma_{00}$ )    | 90.337   | 1.759 | 51.352  | <0.001  |
|                                                        | Time ( $\gamma_{10}$ )         | 0.290    | 0.069 | 4.225   | <0.001  |
|                                                        | PROTECT*Time ( $\gamma_{11}$ ) | -0.128   | 0.109 | -1.179  | 0.239   |
| Self-Efficacy<br>(SWE)                                 | Intercept ( $\gamma_{00}$ )    | 27.399   | 0.428 | 63.949  | <0.001  |
|                                                        | Time ( $\gamma_{10}$ )         | 0.048    | 0.025 | 1.907   | 0.057   |
|                                                        | PROTECT*Time ( $\gamma_{11}$ ) | 0.289    | 0.040 | 0.721   | 0.471   |

*Note.* PROTECT=dummy coded group variable (1=PROTECT intervention group, 0=assessment-only control group). The time parameter is scaled in months.

## eReferences

1. Lindenberg K, Halasy K, Schoenmaekers S. A randomized efficacy trial of a cognitive-behavioral group intervention to prevent Internet Use Disorder onset in adolescents: The PROTECT study protocol. *Contemporary Clinical Trials Communications*. 2017;6:64-71. doi:10.1016/j.conctc.2017.02.011
2. Höcker A, Engberding M, Rist F. *Prokrastination: Ein Manual Zur Behandlung Des Pathologischen Aufschiebens*. Hogrefe Verlag; 2013.
3. Goodman R. The Strengths and Difficulties Questionnaire (SDQ). In: VandeCreek L, Jackson TL, VandeCreek L(Jackson TL(eds. *Innovations in clinical practice: Focus on children & adolescents*. Professional Resource Press/Professional Resource Exchange; 2003:109-111.
4. Stiensmeier-Pelster J, Schürmann M, Duda K. *Depressions-Inventar Für Kinder Und Jugendliche:(DIKJ)*. Hogrefe; 2000.
5. Kovacs M. The Children's Depression, Inventory (CDI). *Psychopharmacol Bull*. 1985;21(4):995-998.
6. Mattick RP, Clarke J. Development and validation of measures of social phobia scrutiny fear and social interaction anxiety1. *Behaviour Research and Therapy*. 1998;36(4):455-470. doi:10.1016/S0005-7967(97)10031-6
7. Stangier -U, Heidenreich -T, Berardi A, Golbs -U, Hoyer -J. *Social Interaction Anxiety Scale - deutsche Fassung*. 1999.
8. Döpfner M, Schnabel M, Goletz H, Ollendick T. *Phobiefragebogen Für Kinder Und Jugendliche: PHOKI*. Hogrefe; 2006.
9. Ollendick TH. *Reliability and Validity of the Revised Fear Survey Schedule for Children (FSSC-R)*. 1983.
10. Grob A, Smolenski C. *FEEL-KJ: Fragebogen Zur Erhebung Der Emotionsregulation Bei Kindern Und Jugendlichen*; 2005.
11. Petermann U, Petermann F. *Schülereinschätzliste Für Sozial-Und Lernverhalten: SSL*. Hogrefe; 2014.
12. Schwarzer R, Jerusalem M. *Skalen Zur Erfassung Von Lehrer- Und Schülermerkmalen: Dokumentation Der Psychometrischen Verfahren Im Rahmen Der Wissenschaftlichen Begleitung Des Modellversuchs Selbstwirksame Schulen*; 1999.
13. Lindenberg K, Kindt S, Szász-Janocha C. *Internet Addiction in Adolescents: The PROTECT Program for Evidence-Based Prevention and Treatment*. Springer; 2020.
