# Supplementary material for: Effectiveness of Cognitive Behavioral Therapy–Based Intervention in Preventing Gaming Disorder and Unspecified Internet Use Disorder in Adolescents: A Cluster Randomized Clinical Trial
Source: PubMed Central journal article supplement (PMC8857686; doi:10.1001/jamanetworkopen.2021.48995), 2022-02-18
Supplement: jamanetwopen-e2148995-s003.pdf [file jamanetwopen-e2148995-s003.pdf]

## Data Sharing Statement

Lindenberg. Effectiveness of Cognitive Behavioral Therapy-Based Intervention in Preventing Gaming Disorder and Unspecified Internet Use Disorder in Adolescents. *JAMA Netw Open*. Published February 18, 2022. doi:10.1001/jamanetworkopen.2021.48995

### Data

**Data available:** No

### Additional Information

**Explanation for why data not available:** on request via email: [lindenberg@psych.uni-frankfurt.de](mailto:lindenberg@psych.uni-frankfurt.de)
